# Supplementary material for: CXCL12 enhances pregnancy outcome via improvement of endometrial receptivity in mice
Source: PubMed Central journal article supplement (PMC8016928; doi:10.1038/s41598-021-86956-y), 2021-04-01
Supplement: 41598_2021_86956_MOESM1_ESM.pdf [file 41598_2021_86956_MOESM1_ESM.pdf]

**Embryo-derived chemokine CXCL12 enhances pregnancy outcome via improvement of endometrial receptivity in mice**

<sup>1</sup>Hwa Seon Koo, <sup>2</sup>Min-Ji Yoon, <sup>1</sup>Seon-Hwa Hong, <sup>2</sup>Jungho Ahn, <sup>2</sup>Hwijae Cha, <sup>2</sup>Danbi Lee, <sup>1</sup>Hwang Kwon, <sup>1</sup>Dong Hee Choi, <sup>2</sup>Kyung-Ah Lee, <sup>2</sup>Jung-Jae Ko, <sup>2</sup>Youn-Jung Kang

**Affiliation**

<sup>1</sup>CHA Fertility Center Bundang, <sup>2</sup>CHA University, Seongnam-si, Gyunggi-do, South Korea

Author for correspondence (yjkang@cha.ac.kr)

# Supplementary Figure 1

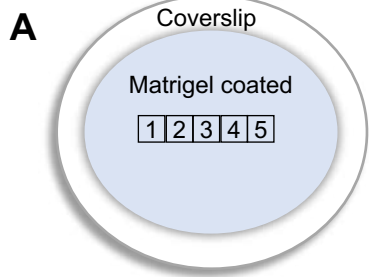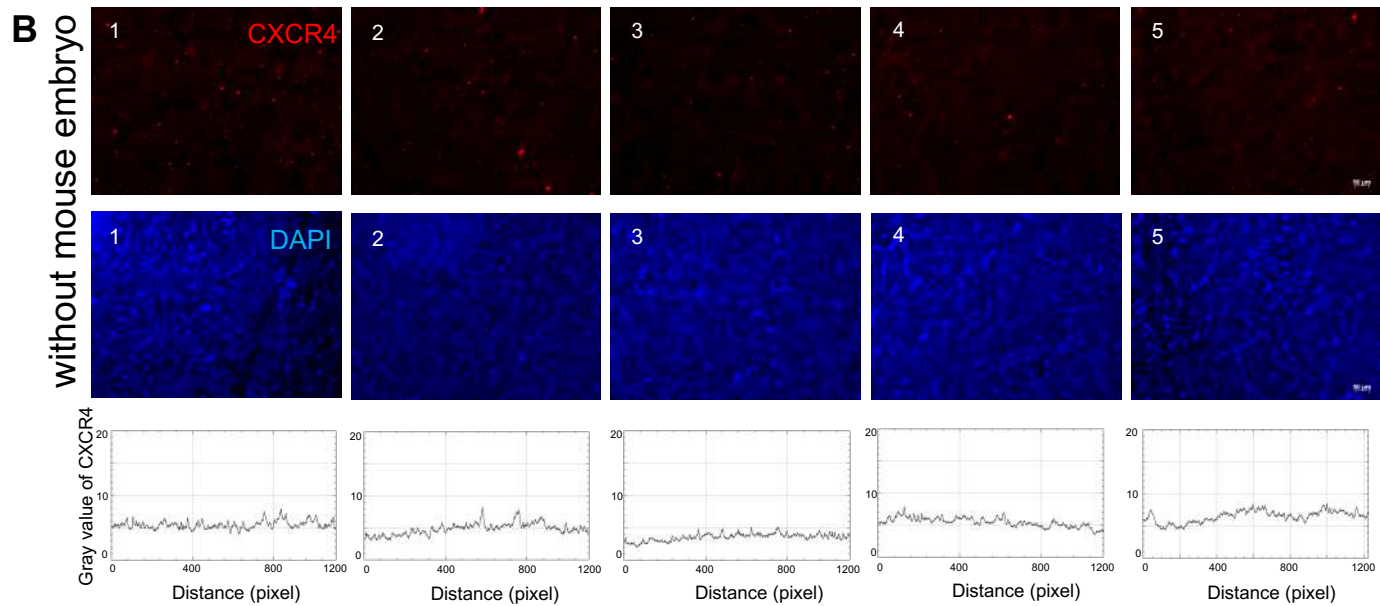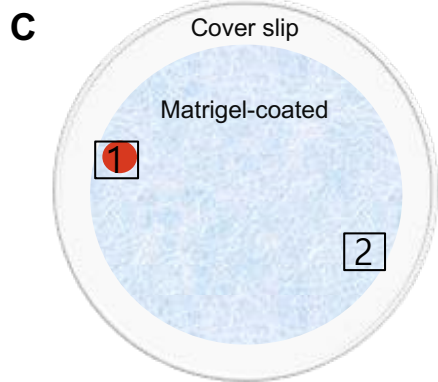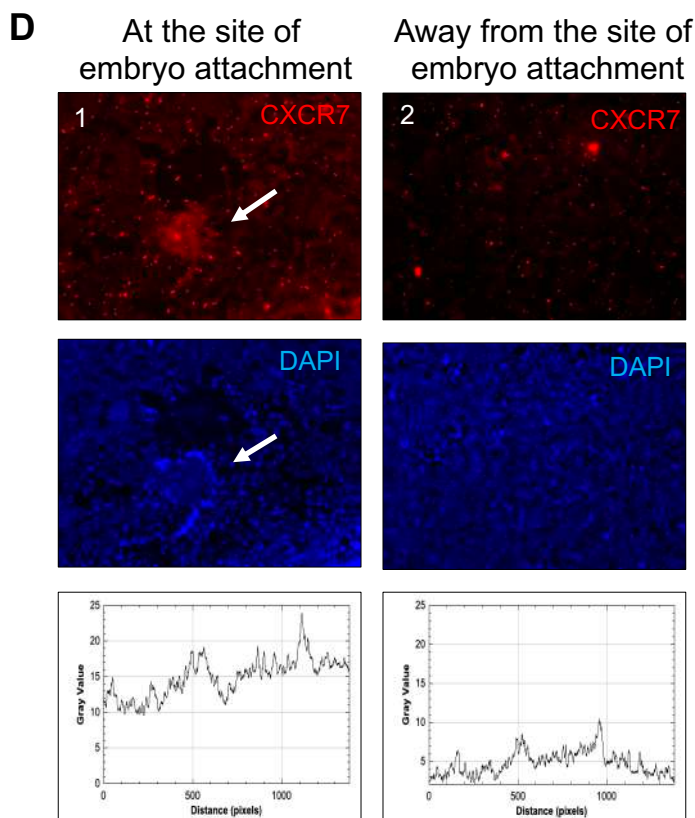

# Supplementary Figure 2

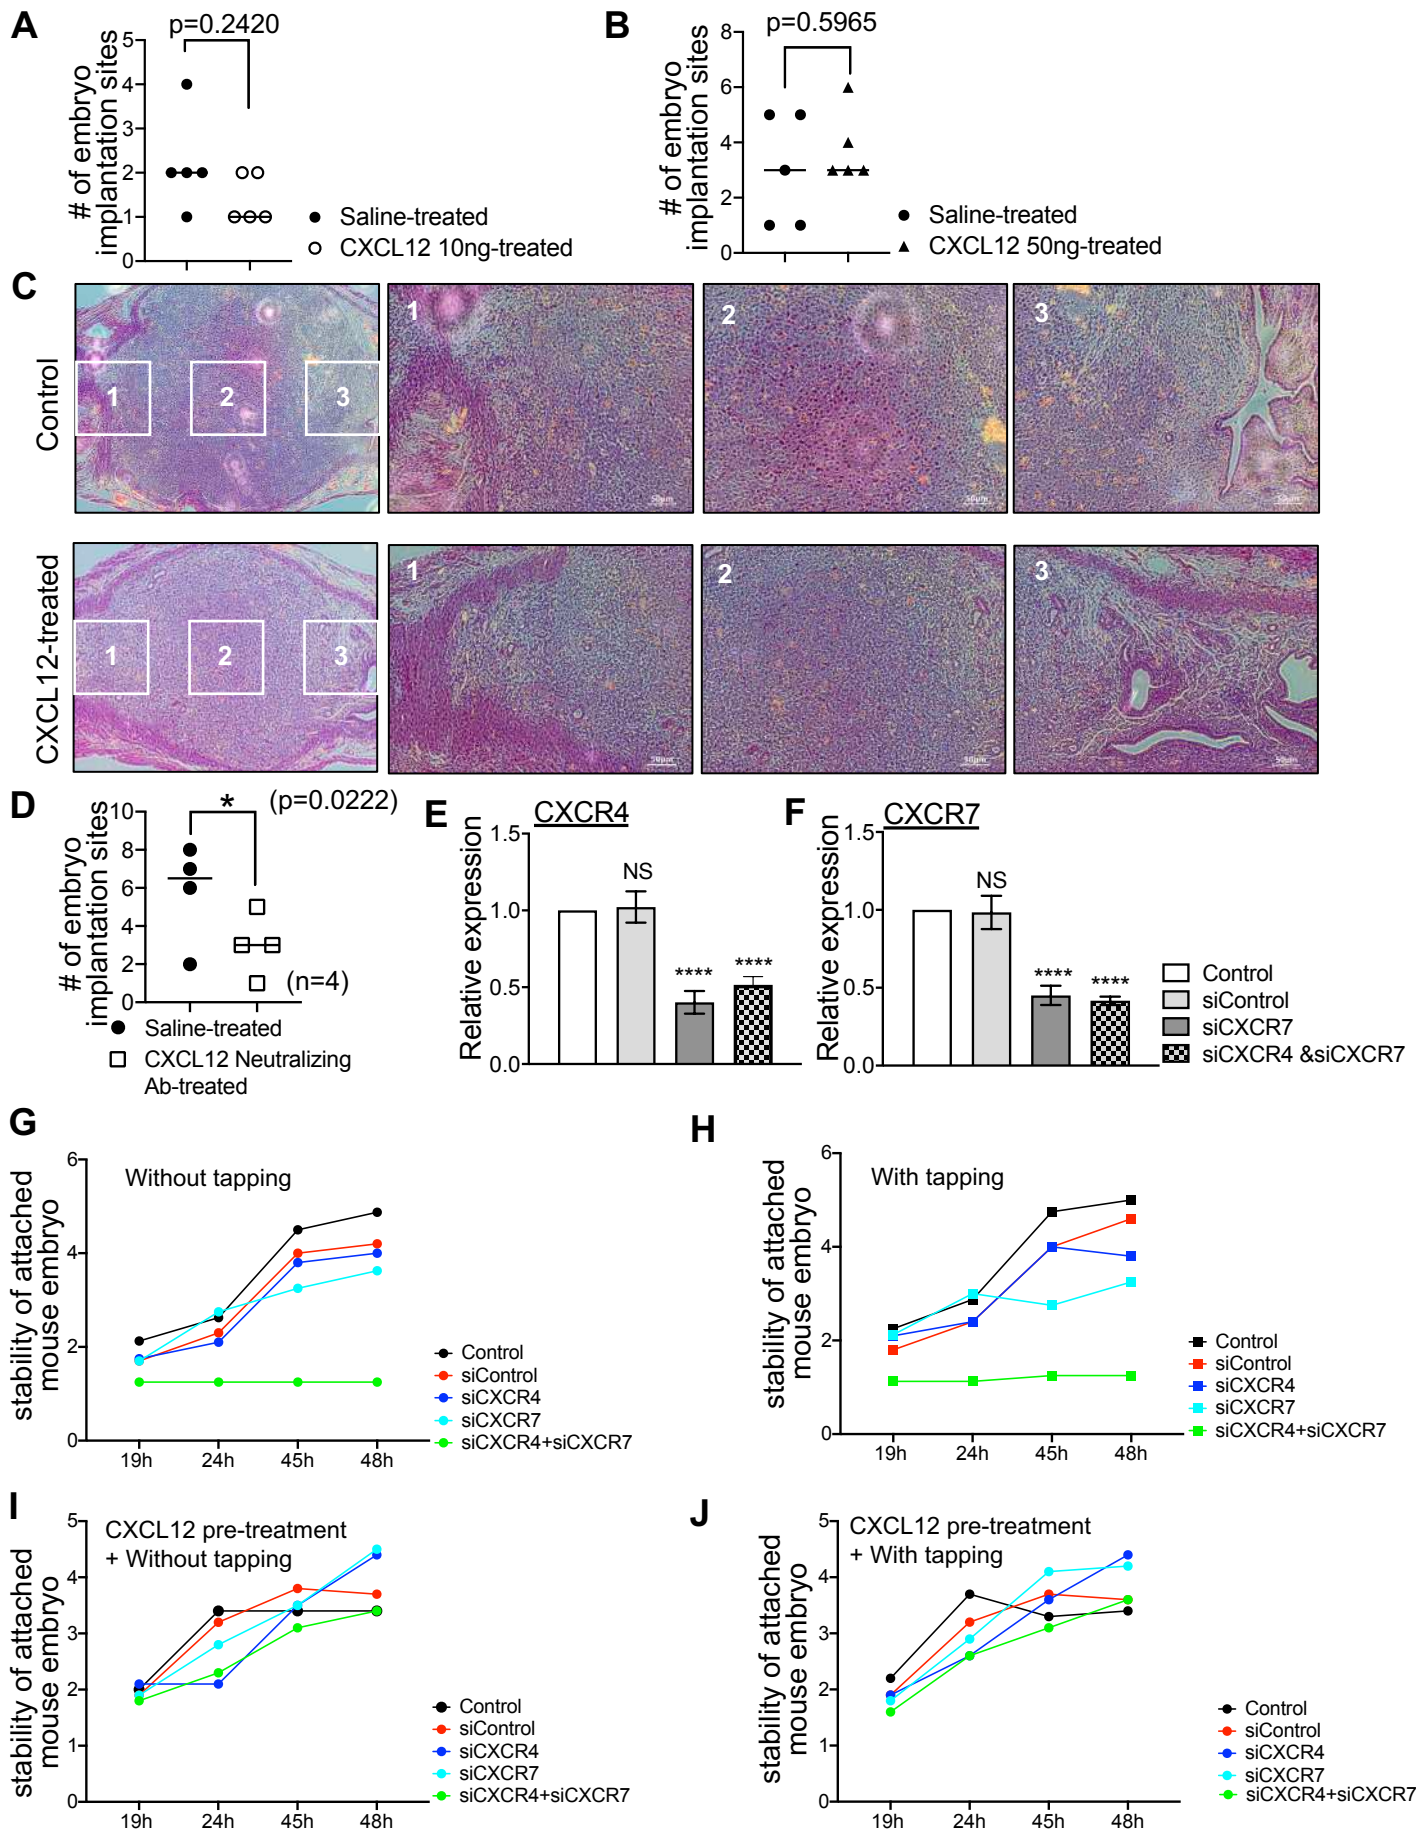

|            |         |                         |
|------------|---------|-------------------------|
| ITGB3      | Forward | GCTCACCTTGTCCAGAAAC     |
|            | Reverse | CTGAGGAAAGGGAATTGTATG   |
| LIF        | Forward | ATTGTGCCCTTACTGCTGCTG   |
|            | Reverse | GCCAGTTGATTCTTGATCTGGT  |
| Glycodelin | Forward | ACTTCGCCATCATGGACTTGG   |
|            | Reverse | CTGGTGCGATGCCTCTTCTG    |
| CD31       | Forward | GGTGCATGGCGTATCCAAG     |
|            | Reverse | TGGAGGTCTTATCTATCCTTCGC |
| CD34       | Forward | CTTCCCCAACTGGCATACTGC   |
|            | Reverse | TCCAGAGCATTTGATTTCTCCC  |
| VEGFR1     | Forward | CACTGACATACCCAACTTGTGC  |
|            | Reverse | GTCCCATGTTATTCTTTGCCAT  |
| VEGFR2     | Forward | CAAACCTCAATGTGTCTCTTGC  |
|            | Reverse | AGAGTAAAGCCTATCTCGCTGT  |
| TIE1       | Forward | GGTCACACACACGGTGAACAA   |
|            | Reverse | TGCCAGTCTAGGGTATTGAAGTA |
| TIE2       | Forward | CTGGAGGTTACTCAAGATGTGAC |
|            | Reverse | TCCGTATCCTTATAGCCTGTCC  |
| ANG1       | Forward | AAAATGGGTTTTGGGAATCCCT  |
|            | Reverse | TCGGCACCGTGTAAGATCAAG   |
| ANG2       | Forward | GGACAGTCATCCAACACCGAG   |
|            | Reverse | GACTCTTCACCAGCGAGGTAG   |

|                |         |                       |
|----------------|---------|-----------------------|
| $\beta$ -actin | Forward | CATGTACGTTGCTATCCAGGC |
|                | Reverse | GCCTTAATGTCACGCACGAT  |

Supplementary Table 1. Primer sequence pairs used for RT-PCR analyses.

| Gene                                        |    | Source                                      | CAT#        | Sequences           |
|---------------------------------------------|----|---------------------------------------------|-------------|---------------------|
| On-Target plus SMART pool siRNA-human CXCR4 | #1 | Dharmacon Horizon Discovery, Lafayette, USA | J-005139-06 | GAAGCAUGACGGACAAGUA |
|                                             | #2 | Dharmacon Horizon Discovery, Lafayette, USA | J-005139-07 | GGCCUUAUCCUGCCUGGUA |
|                                             | #3 | Dharmacon Horizon Discovery, Lafayette, USA | J-005139-08 | UAACUACACCGAGGAAAUG |
|                                             | #4 | Dharmacon Horizon Discovery, Lafayette, USA | J-005139-09 | CAAGCAAGGGUGUGAGUUU |
| On-Target plus SMART pool siRNA-human CXCR7 | #1 | Dharmacon Horizon Discovery, Lafayette, USA | J-013212-10 | GCCGUUCCCUUCUCCAUA  |
|                                             | #2 | Dharmacon Horizon Discovery, Lafayette, USA | J-013212-11 | UACACGCUCUCCUUCAUUU |
|                                             | #3 | Dharmacon Horizon Discovery, Lafayette, USA | J-013212-12 | GAGCUGGUCUCCGUUGUCU |
|                                             | #4 | Dharmacon Horizon Discovery, Lafayette, USA | J-013212-13 | GCUCAUCGAUGCCUCCAGA |

Supplementary Table 2. Sequences of siRNA.

| Large category          | Small category                                                   | Term                                                                                       | Term P-value |
|-------------------------|------------------------------------------------------------------|--------------------------------------------------------------------------------------------|--------------|
| Biological process (BP) | Embryo implantation                                              | GO:0001835~blastocyst hatching                                                             | 2.97E-04     |
| Biological process (BP) |                                                                  | GO:0007566~embryo implantation                                                             | 8.30E-04     |
| Biological process (BP) | Sprouting angiogenesis                                           | GO:0002040~sprouting angiogenesis                                                          | 4.85E-08     |
| Biological process (BP) |                                                                  | GO:0002042~cell migration involved in sprouting angiogenesis                               | 3.94E-07     |
| Biological process (BP) |                                                                  | GO:0043534~blood vessel endothelial cell migration                                         | 1.93E-05     |
| Biological process (BP) | Regulation of vasculature development                            | GO:0016525~negative regulation of angiogenesis                                             | 4.36E-08     |
| Biological process (BP) |                                                                  | GO:0030947~regulation of vascular endothelial growth factor receptor signaling pathway     | 8.87E-05     |
| Biological process (BP) |                                                                  | GO:0048010~vascular endothelial growth factor receptor signaling pathway                   | 2.91E-04     |
| Biological process (BP) |                                                                  | GO:1901342~regulation of vasculature development                                           | 9.17E-16     |
| Biological process (BP) |                                                                  | GO:1901343~negative regulation of vasculature development                                  | 1.33E-10     |
| Biological process (BP) |                                                                  | GO:2000181~negative regulation of blood vessel morphogenesis                               | 5.12E-08     |
| Biological process (BP) | Regulation of epidermal growth factor receptor signaling pathway | GO:0005006~epidermal growth factor-activated receptor activity                             | 8.87E-05     |
| Biological process (BP) |                                                                  | GO:0007173~epidermal growth factor receptor signaling pathway                              | 7.89E-06     |
| Biological process (BP) |                                                                  | GO:0038127~ERBB signaling pathway                                                          | 1.29E-05     |
| Biological process (BP) |                                                                  | GO:0042058~regulation of epidermal growth factor receptor signaling pathway                | 3.65E-05     |
| Biological process (BP) |                                                                  | GO:0045742~positive regulation of epidermal growth factor receptor signaling pathway       | 7.33E-05     |
| Biological process (BP) |                                                                  | GO:1901184~regulation of ERBB signaling pathway                                            | 4.77E-05     |
| Biological process (BP) |                                                                  | GO:1901186~positive regulation of ERBB signaling pathway                                   | 8.87E-05     |
| Biological process (BP) | Regulation of collagen metabolic process                         | GO:0003197~endocardial cushion development                                                 | 2.41E-04     |
| Biological process (BP) |                                                                  | GO:0010712~regulation of collagen metabolic process                                        | 4.70E-07     |
| Biological process (BP) |                                                                  | GO:0032330~regulation of chondrocyte differentiation                                       | 3.88E-04     |
| Biological process (BP) |                                                                  | GO:0032331~negative regulation of chondrocyte differentiation                              | 2.93E-05     |
| Biological process (BP) |                                                                  | GO:0061037~negative regulation of cartilage development                                    | 7.33E-05     |
| Biological process (BP) | Regulation of muscle contraction                                 | GO:0001990~regulation of systemic arterial blood pressure by hormone                       | 2.91E-04     |
| Biological process (BP) |                                                                  | GO:0001991~regulation of systemic arterial blood pressure by circulatory renin-angiotensin | 1.36E-05     |
| Biological process (BP) |                                                                  | GO:0003014~renal system process                                                            | 7.64E-07     |
| Biological process (BP) |                                                                  | GO:0003044~regulation of systemic arterial blood pressure mediated by a chemical signal    | 1.63E-05     |
| Biological process (BP) |                                                                  | GO:0003071~renal system process involved in regulation of systemic arterial blood pressure | 5.37E-05     |
| Biological process (BP) |                                                                  | GO:0003073~regulation of systemic arterial blood pressure                                  | 1.11E-06     |
| Biological process (BP) |                                                                  | GO:0003081~regulation of systemic arterial blood pressure by renin-angiotensin             | 1.06E-04     |
| Biological process (BP) |                                                                  | GO:0003085~negative regulation of systemic arterial blood pressure                         | 6.64E-05     |
| Biological process (BP) |                                                                  | GO:0006937~regulation of muscle contraction                                                | 1.14E-08     |
| Biological process (BP) |                                                                  | GO:0006939~smooth muscle contraction                                                       | 5.37E-07     |
| Biological process (BP) |                                                                  | GO:0006940~regulation of smooth muscle contraction                                         | 2.42E-08     |
| Biological process (BP) |                                                                  | GO:0035150~regulation of tube size                                                         | 3.17E-07     |

|                         |                |                                                             |          |
|-------------------------|----------------|-------------------------------------------------------------|----------|
| Biological process (BP) |                | GO:0035296~regulation of tube diameter                      | 3.04E-07 |
| Biological process (BP) |                | GO:0042311~vasodilation                                     | 1.25E-04 |
| Biological process (BP) |                | GO:0044060~regulation of endocrine process                  | 1.87E-05 |
| Biological process (BP) |                | GO:0045776~negative regulation of blood pressure            | 2.57E-05 |
| Biological process (BP) |                | GO:0045907~positive regulation of vasoconstriction          | 2.57E-04 |
| Biological process (BP) |                | GO:0045933~positive regulation of muscle contraction        | 1.32E-05 |
| Biological process (BP) |                | GO:0045987~positive regulation of smooth muscle contraction | 2.65E-06 |
| Biological process (BP) |                | GO:0061045~negative regulation of wound healing             | 5.28E-05 |
| Biological process (BP) |                | GO:0097746~regulation of blood vessel diameter              | 3.04E-07 |
| Biological process (BP) |                | GO:0097755~positive regulation of blood vessel diameter     | 1.37E-06 |
| Biological process (BP) |                | GO:0098801~regulation of renal system process               | 4.45E-06 |
| Biological process (BP) |                | GO:1900046~regulation of hemostasis                         | 7.06E-05 |
| Biological process (BP) |                | GO:1900047~negative regulation of hemostasis                | 3.47E-04 |
| Biological process (BP) |                | GO:1903035~negative regulation of response to wounding      | 1.19E-04 |
| Biological process (BP) |                | GO:1903524~positive regulation of blood circulation         | 5.06E-06 |
| Cellular component (CC) |                | GO:0005901~caveola                                          | 1.04E-05 |
| KEGG pathway            | GnRH secretion | KEGG:04929~GnRH secretion                                   | 6.10E-04 |

**Supplementary Table 3.** Gene Ontology and pathway analysis of a network of gene-gene interaction among CXCL12-regulated genes constructed and visualized in Figure 3F.
